# Supplementary material for: VizCNV: An integrated platform for concurrent phased BAF and CNV analysis with trio genome sequencing data
Source: PubMed Central journal article supplement — bioRxiv. 2024 Oct 29:2024.10.27.620363. Preprint. [Version 1] doi: 10.1101/2024.10.27.620363 (PMC11565771; doi:10.1101/2024.10.27.620363), 2024-10-29
Supplement: media-2.pdf [file media-2.pdf]

**VizCNV: An integrated platform for concurrent phased BAF and CNV analysis with trio genome sequencing data**

Haowei Du<sup>1#</sup>, Ming Yin Lun<sup>2#</sup>, Lidiia Gagarina<sup>2</sup>, Michele G Mehaffey<sup>2</sup>, James Paul Hwang<sup>3</sup>, Shalini N. Jhangiani<sup>3</sup>, Sravya V. Bhamidipati<sup>3</sup>, Donna M. Muzny<sup>3</sup>, M Cecilia Poli<sup>4</sup>, Sebastian Ochoa<sup>5,6</sup>, Ivan K. Chinn<sup>5,6</sup>, Anna Linstrand<sup>10,11</sup>, Jennifer E. Posey<sup>1</sup>, Richard A Gibbs<sup>1,3</sup>, James R. Lupski<sup>1,3,7,8\*</sup>, Claudia M. B. Carvalho<sup>2\*</sup>

a

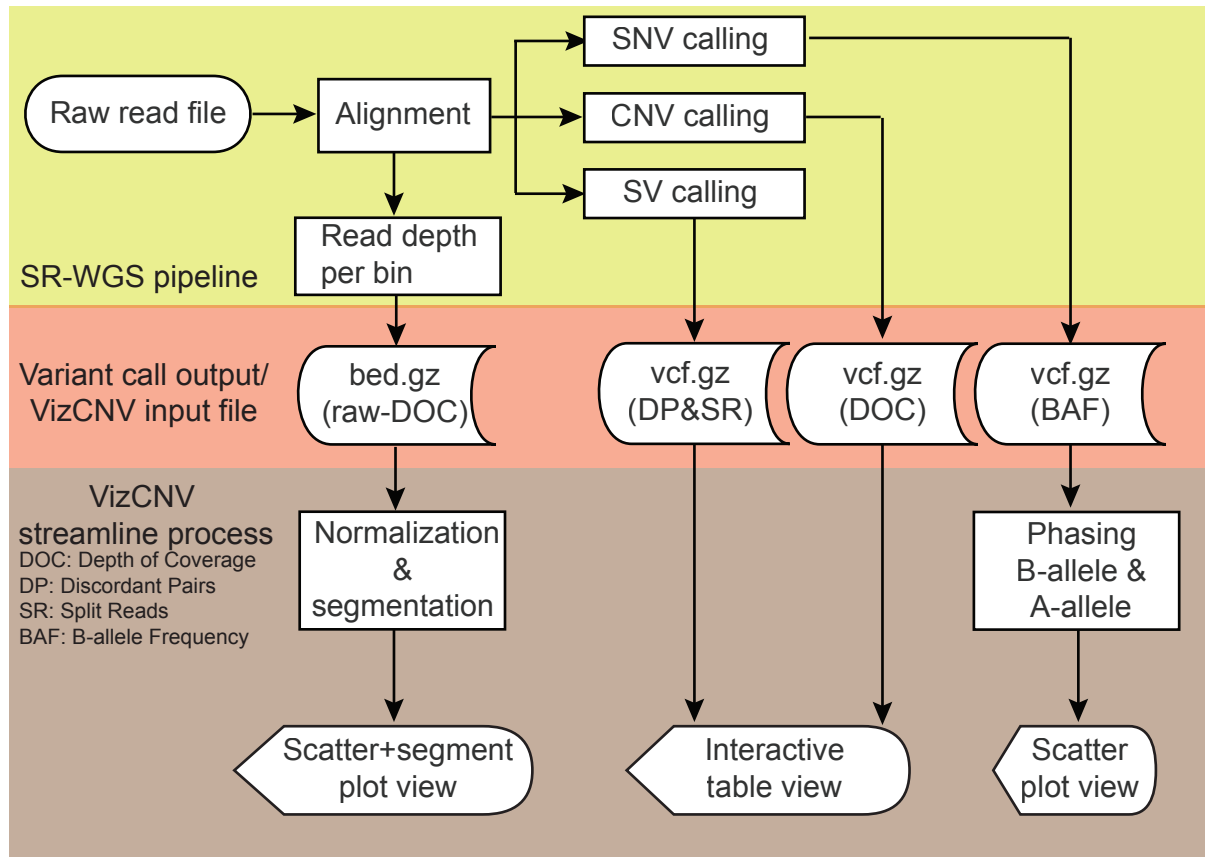

b

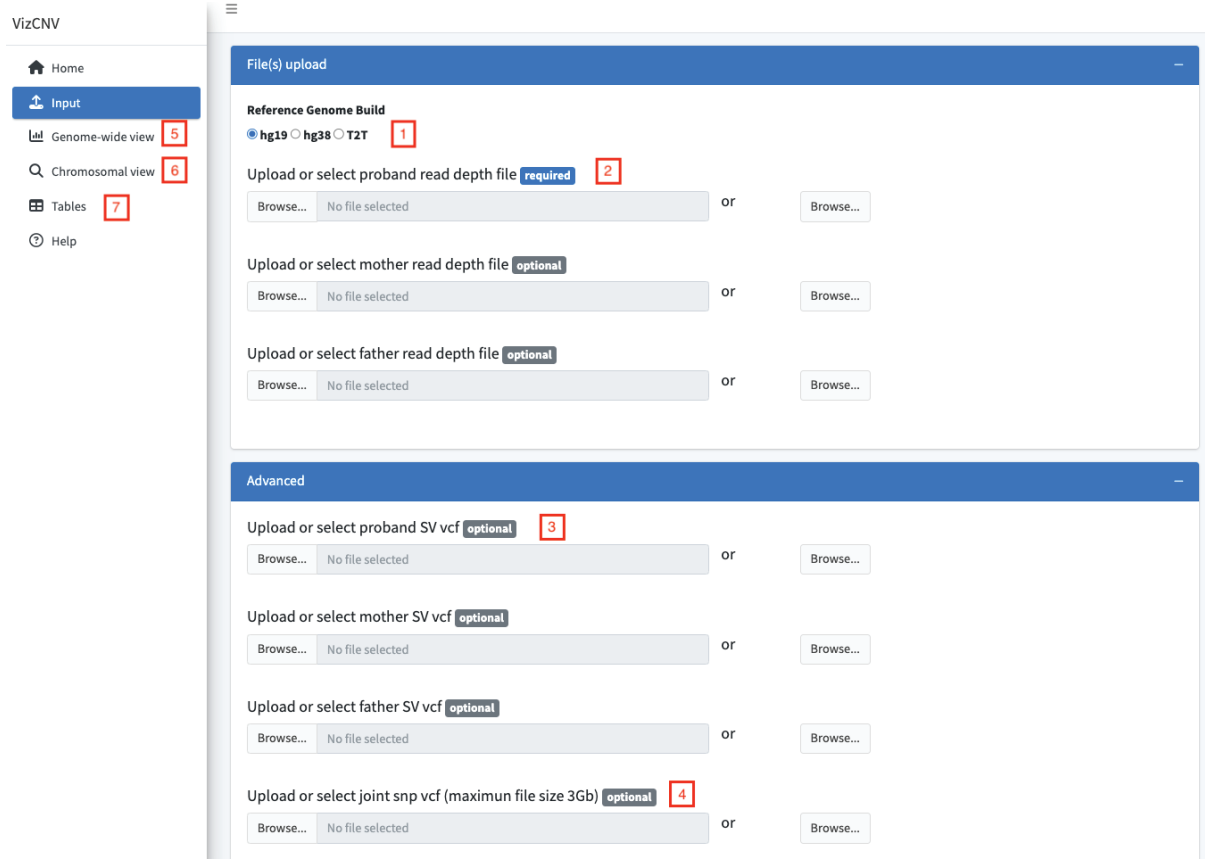

**Figure S1. The framework of VizCNV.** **a)** VizCNV workflow demonstrating the common output files from a standard short read genome sequencing pipeline incorporated into the VizCNV framework. **b)** User interface of the VizCNV. 1) Build-in reference. 2) input for read depth file. 3) input of proband structure variant call file. 4) joint-called genotype file. 5) genome-wide view for aneuploidy or sub-chromosomal events. 6) chromosome view for CNV and BAF inspection. 7) table view with annotate CNV information.

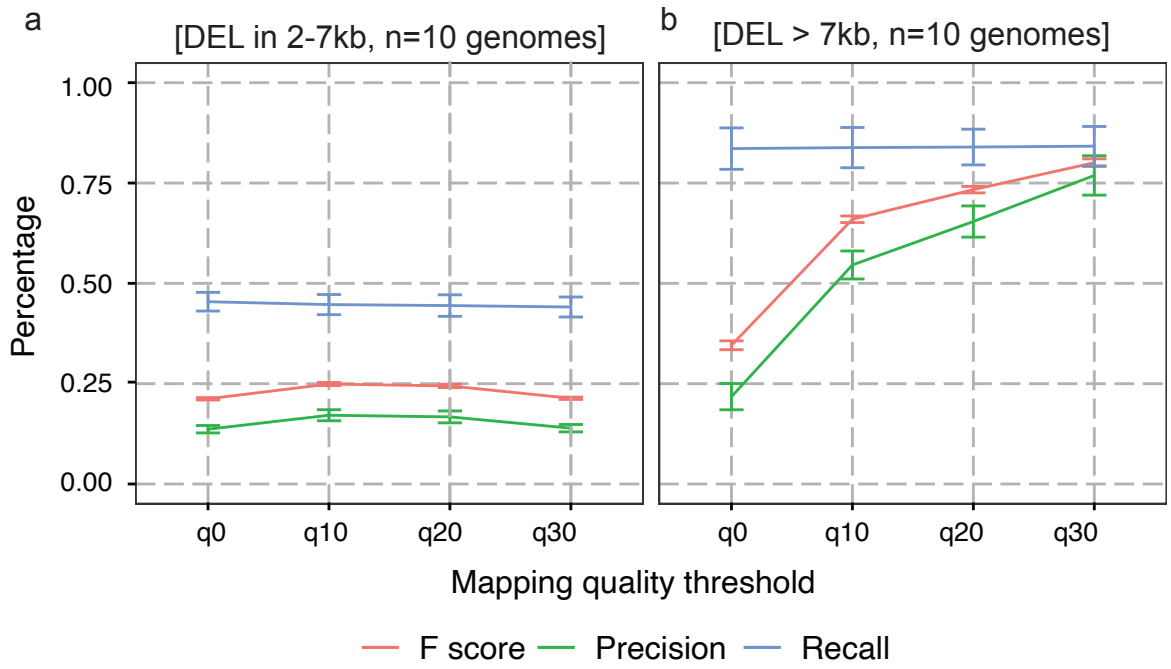

**Figure S2. Performance Metrics of Deletion Detection at Various Mapping Quality Thresholds across 10 1k genomes.** **a)** Deletions ranging from 2-7 kb. Metrics include F score (red), precision (green), and recall (blue), demonstrating the stability of the F score and precision across all thresholds, with a modest increase in recall from q0 to q30. **b)** Deletions larger than 7 kb. The F score, precision, and recall all show an upward trend with increasing mapping quality thresholds, indicating improved detection performance at higher thresholds.

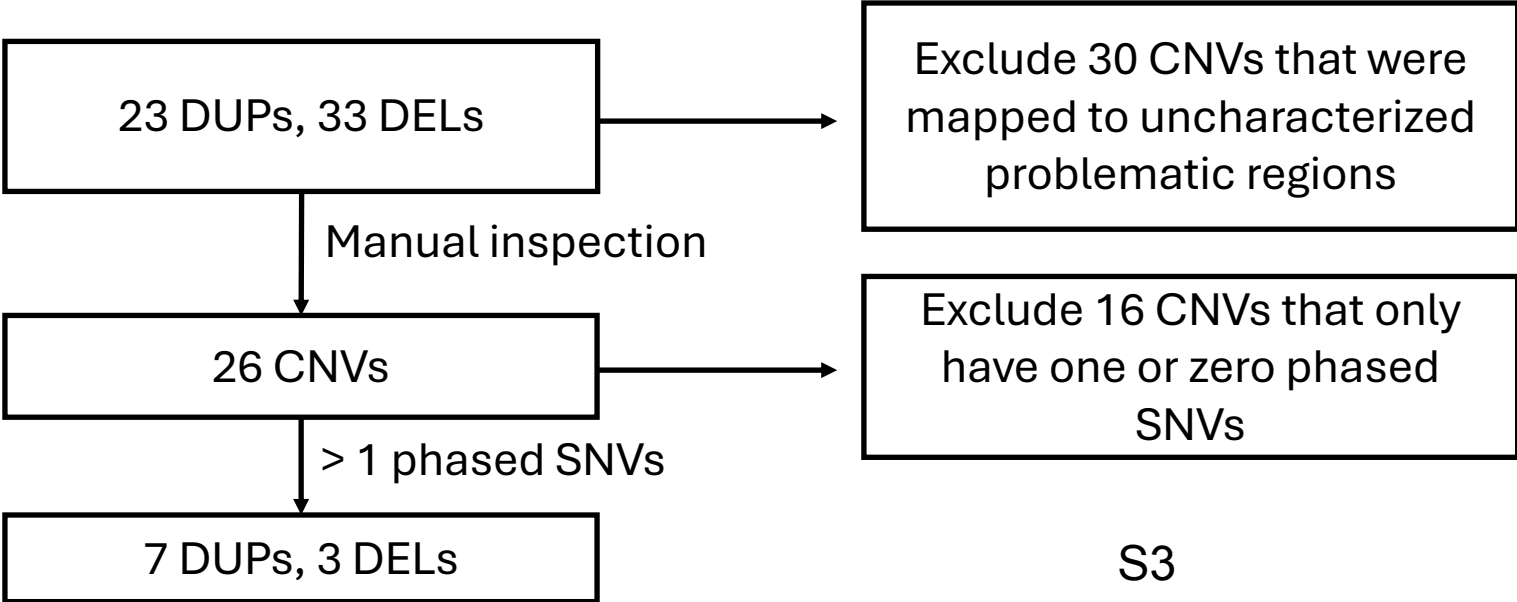

**Figure S3. Schematic Representation of Joint BAF and Read Depth Analysis in the HG00405 Case.**

HG00405, HGSV\_211297, chr16:78673486-79733774

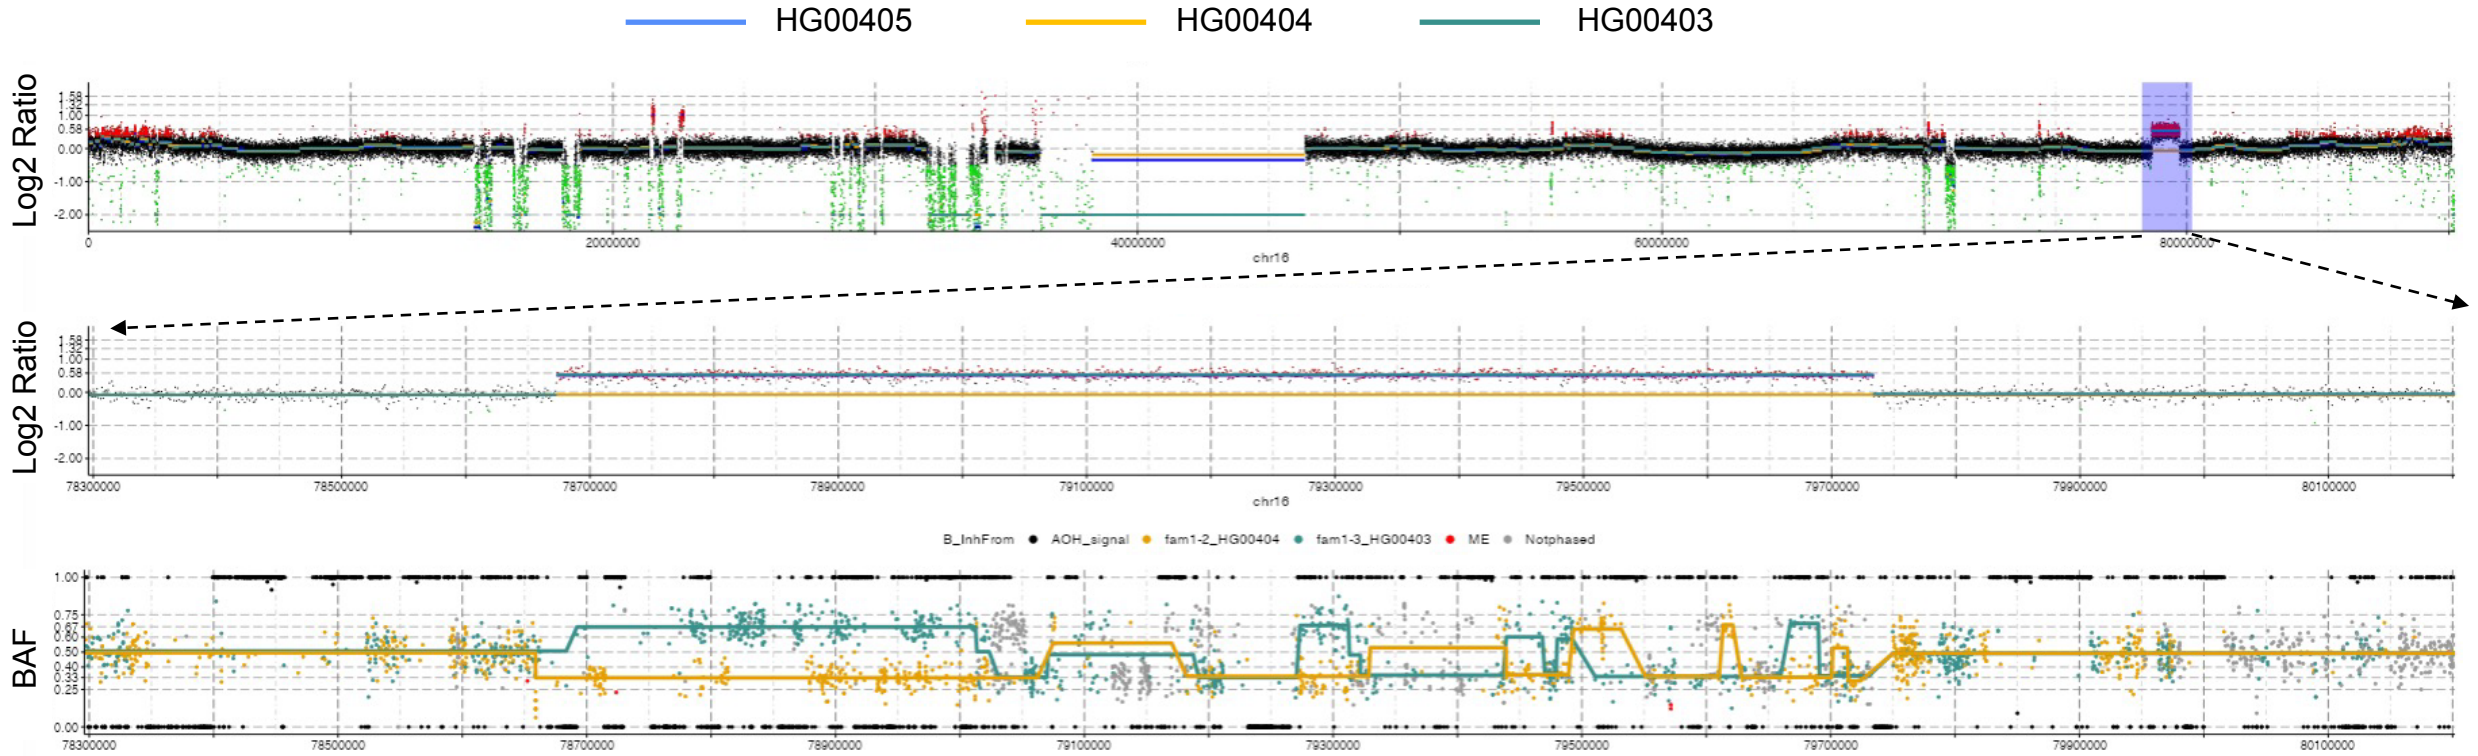



**Figure S4. Paternal Inheritance of Duplication with Potential Recombination.** The top panel presents a whole chromosome  $\log_2$  ratio plot for the child (HG00405), father (HG00403), and mother (HG00404), with a blue rectangle highlighting a ~1 Mb duplication identified in both the child and father. The middle and bottom panels offer a detailed view of the highlighted region, focusing on  $\log_2$  ratio and B-allele frequency (BAF), respectively. Colors indicate the origin of the variant: teal for paternal and orange for maternal.

S5

a

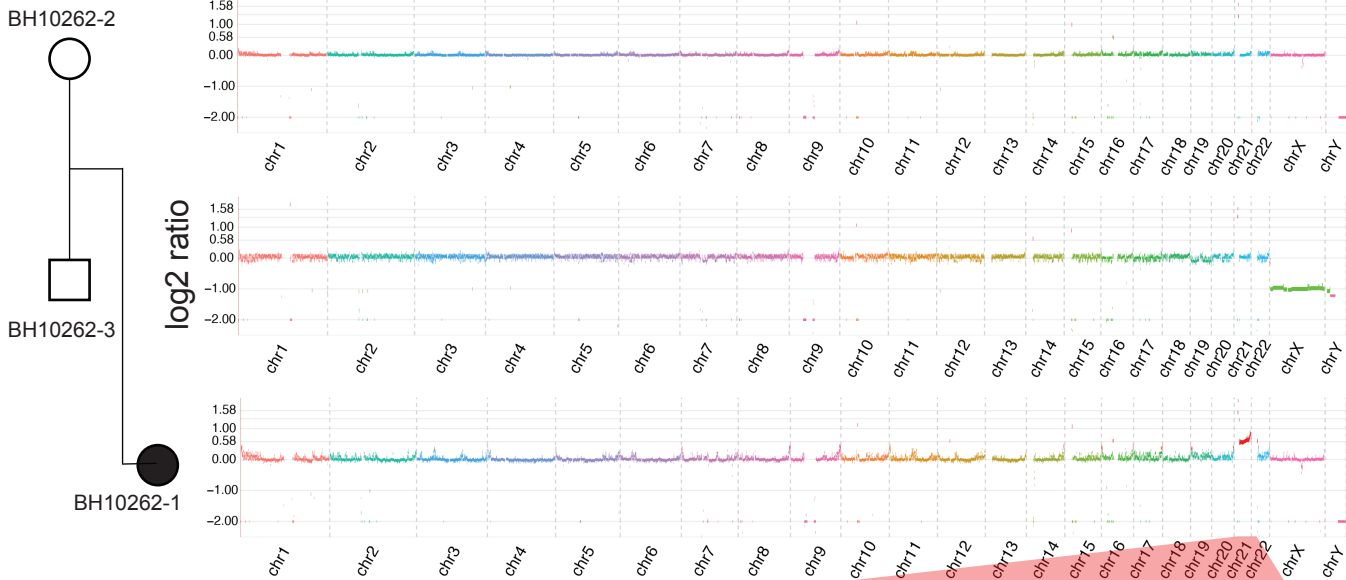

b

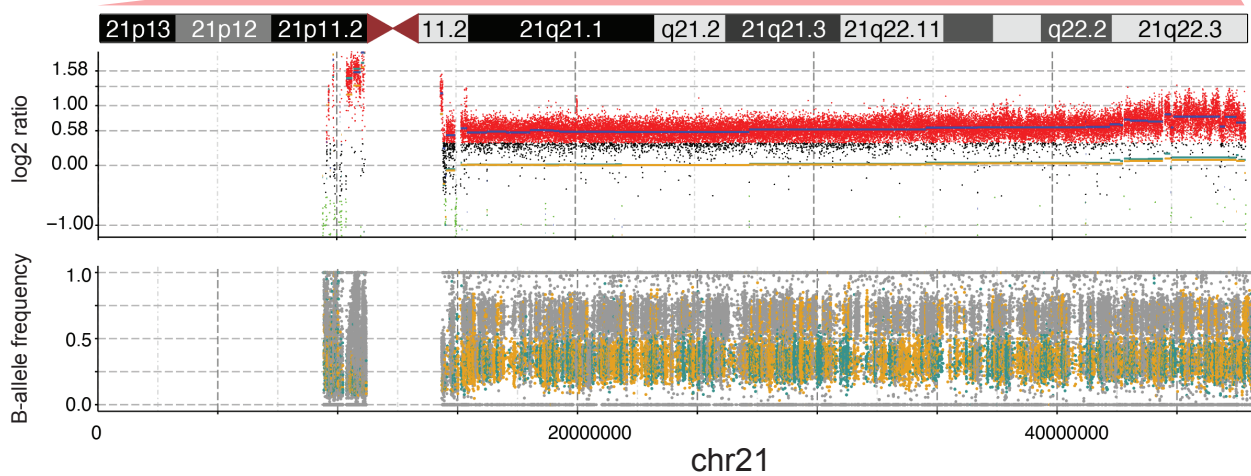

c

| BH10262-3 | BH10262-2 | BH10262-1 | Phased-Baf <sub>exp</sub> |
|-----------|-----------|-----------|---------------------------|
| 0/0       | 0/1       | 0/0/1     | 0.33                      |
| 0/1       | 0/0       | 0/0/1     | 0.33                      |
| 0/0       | 1/1       | 0/1/1     | 0.66                      |
| 0/1       | 0/1       | 0/1/1     | 0.66                      |
| 0/1       | 0/1       | 0/1/1     | 0.66                      |

d

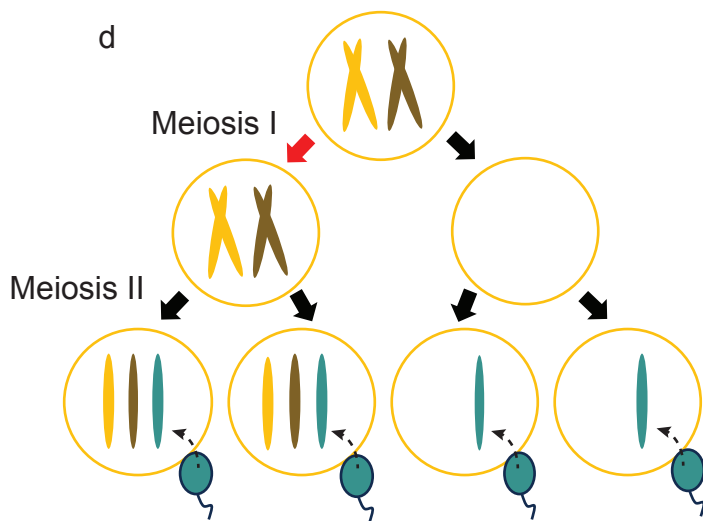

**Figure S5. Genomic analysis of a PIDD family with trisomy 21.** **a)** Genome-wide  $\log_2$  ratio plot with pedigree showing on the left. **b)** Detailed  $\log_2$  ratio and B allele frequency plots for chromosome 21 of the proband, BH10262-1. The top panel shows the  $\log_2$  ratio with regions of interest highlighted, and the bottom panel shows phased B allele frequency- color coding indicates allele origins: yellow for from maternal origin (BH10262-2), blue for paternal (BH10262-3), and grey for indeterminate. **c)** Table show the schema of the phasing. **d)** Schematic representation of meiotic divisions I and II, illustrating chromosomal behavior and potential segregation patterns that could lead to the observed genetic variations in the family. Chromosome coloring corresponds to the B allele origins in **b** and **c**.

S6

a

## VizCNV view

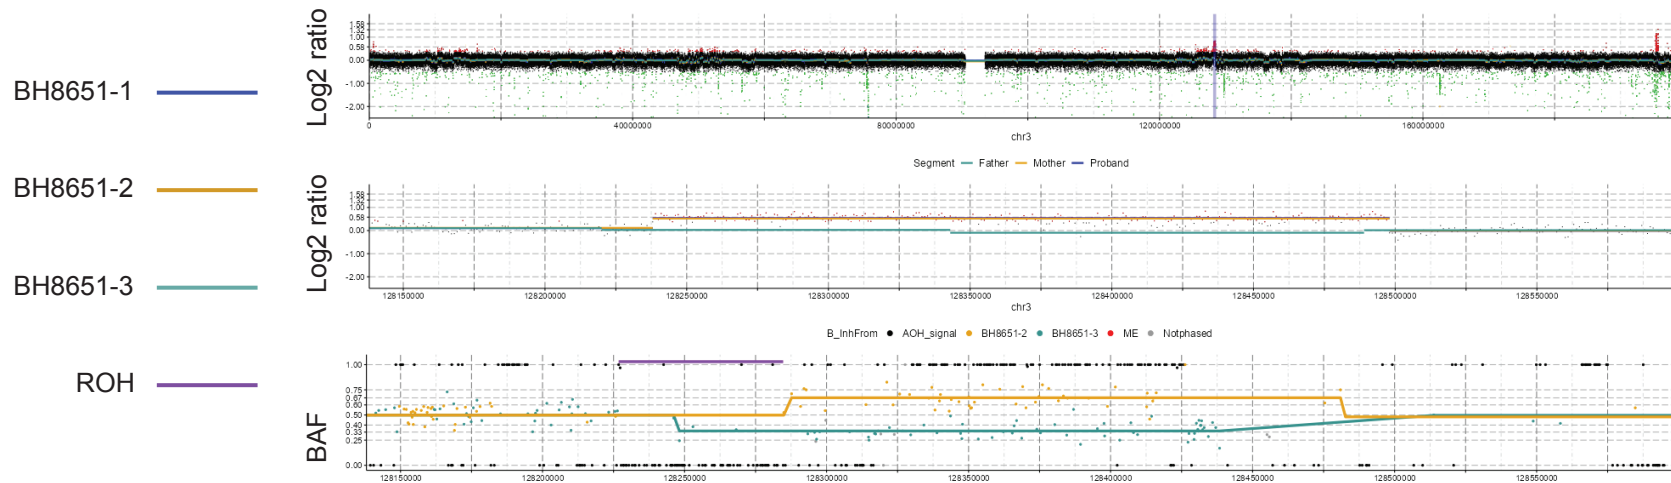

b

## IGV view

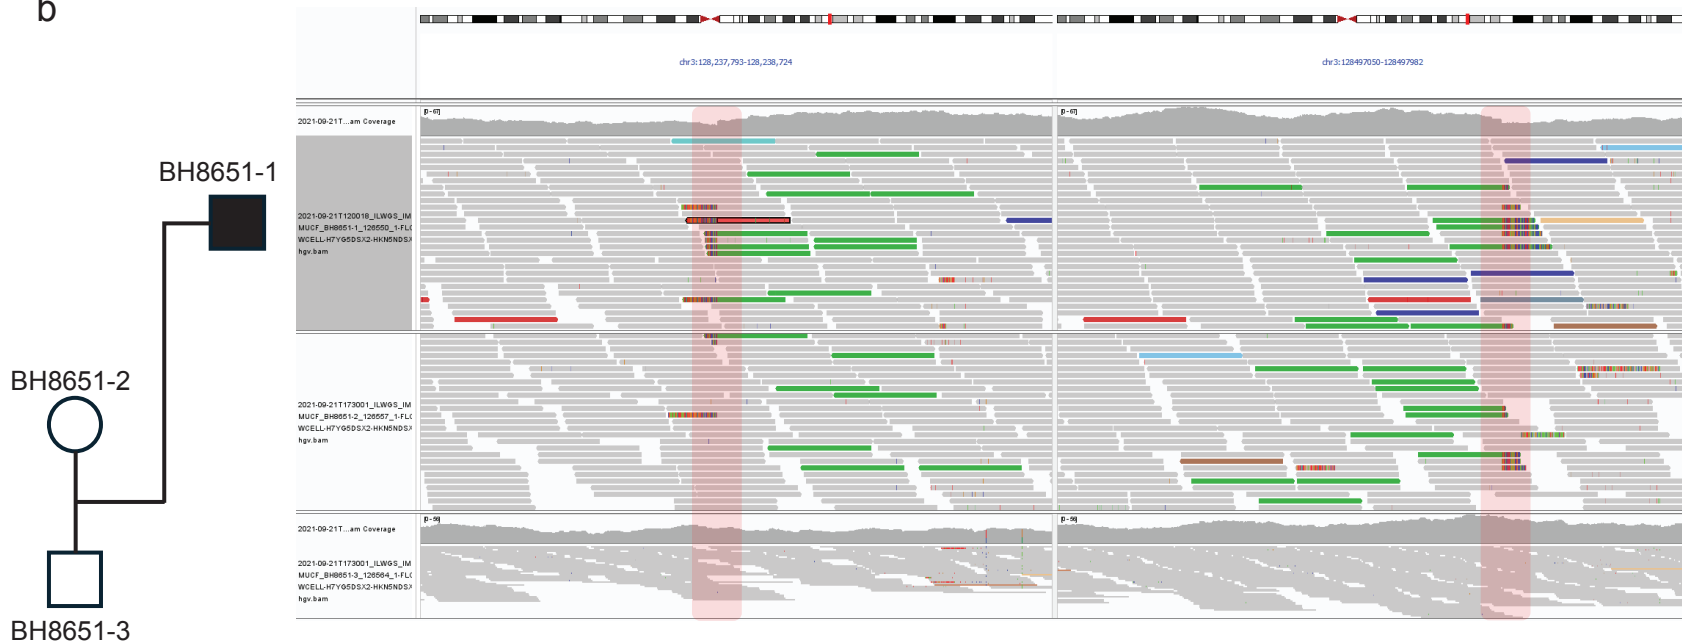

**Figure S6. Representative Duplication with Consistent BAF and  $\log_2$  Analysis.** **a)** The top panel displays the  $\log_2$  ratio of chromosome 3. The middle panel provides a zoomed-in view of the duplication region, while the bottom panel shows the BAF, with lines representing segmented BAF values. Colors represent segments from family members: blue for the proband, teal for the father, and yellow for the mother. Purple segments denote region with ROH call.

**b)** The left side shows the pedigree, and the right side presents the IGV view of the duplication. Highlighted regions point to changes in read depth and several discordant read pairs suggesting a tandem duplication in both the proband and the mother. This case presents a maternally inherited duplication with identical haplotypes.

S7

a

## VizCNV view

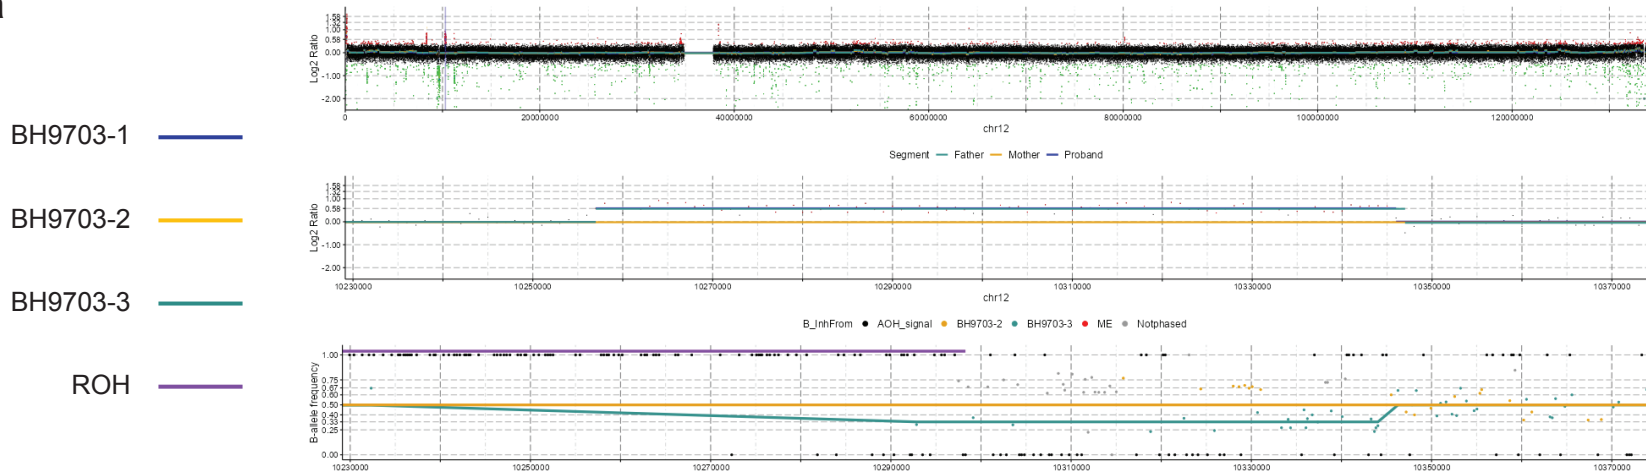

b

## IGV view

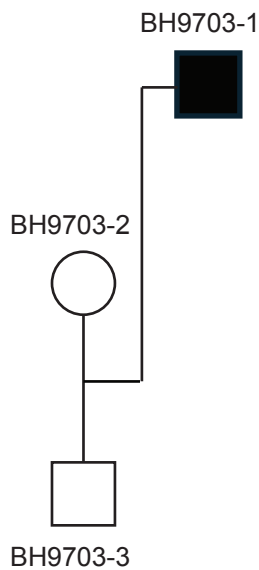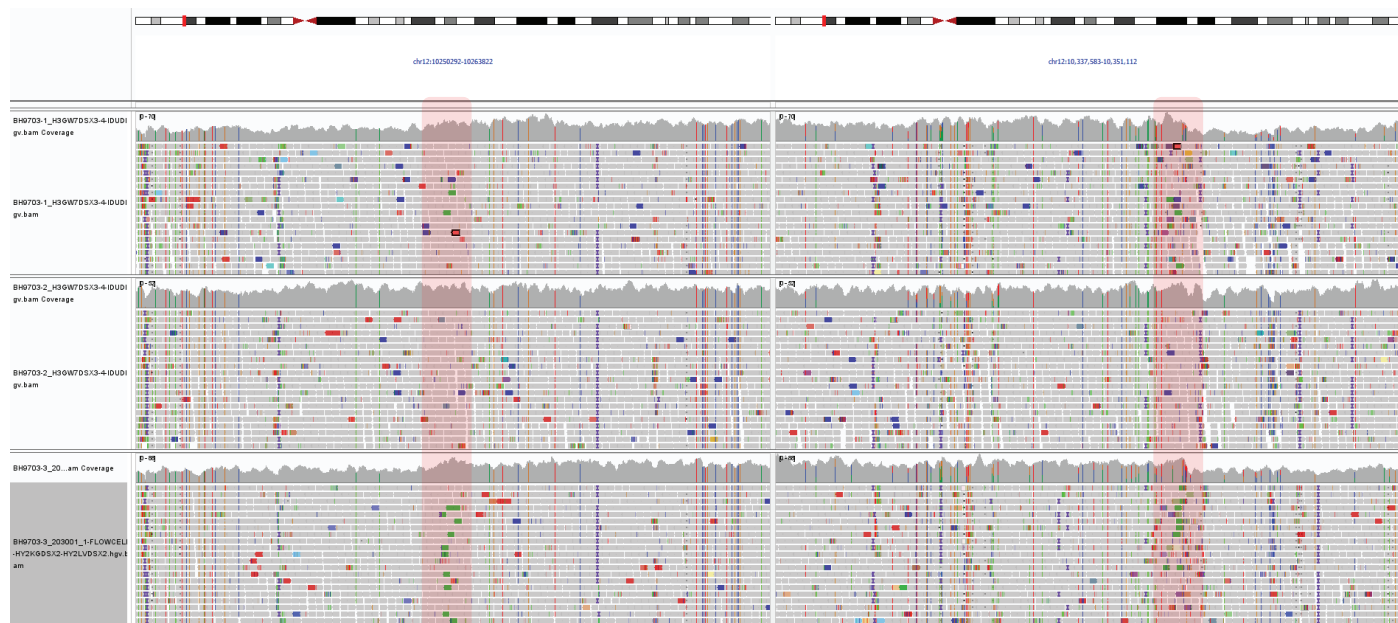

**Figure S7. Paternally Inherited Duplication with Two Different Haplotypes.** **a)** The top panel displays the  $\log_2$  ratio of chromosome 12. The middle panel provides a zoomed-in view of the duplication region, and the bottom panel shows the BAF, with lines representing segmented BAF values. Colors denote individuals from the family: blue for the proband, teal for the father, and yellow for the mother. **b)** The left side shows the pedigree, and the right side presents the IGV view of the duplication. Highlighted regions indicate changes in read depth and several discordant read pairs, suggesting a tandem duplication in both the proband and the father.

8p23.2

chr8

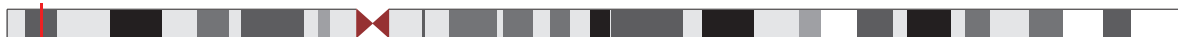

BH9703-1 BH9703-2 BH9703-3

a

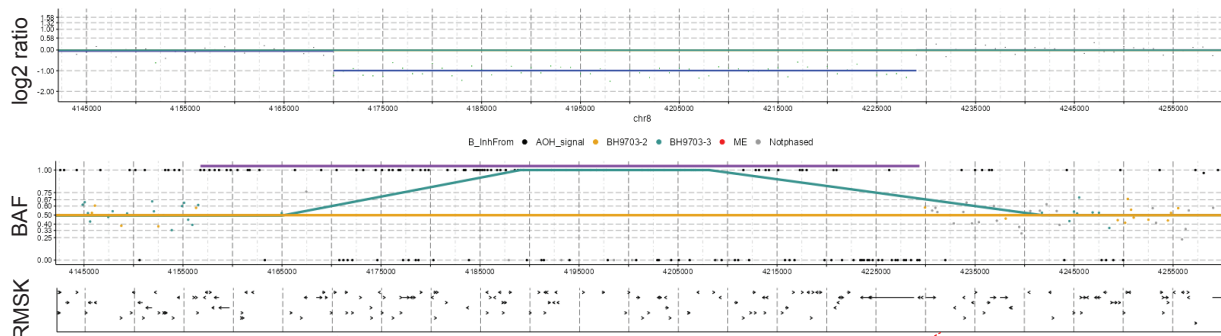

b

ex70

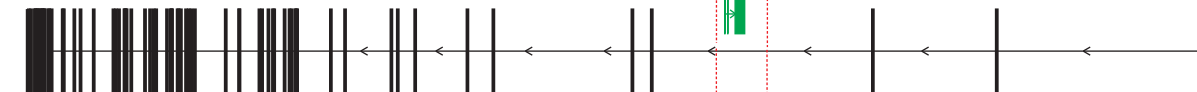

NM\_033225.6

CSMD1

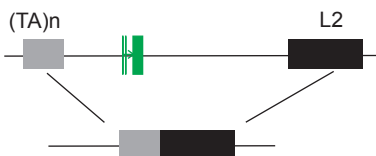

c

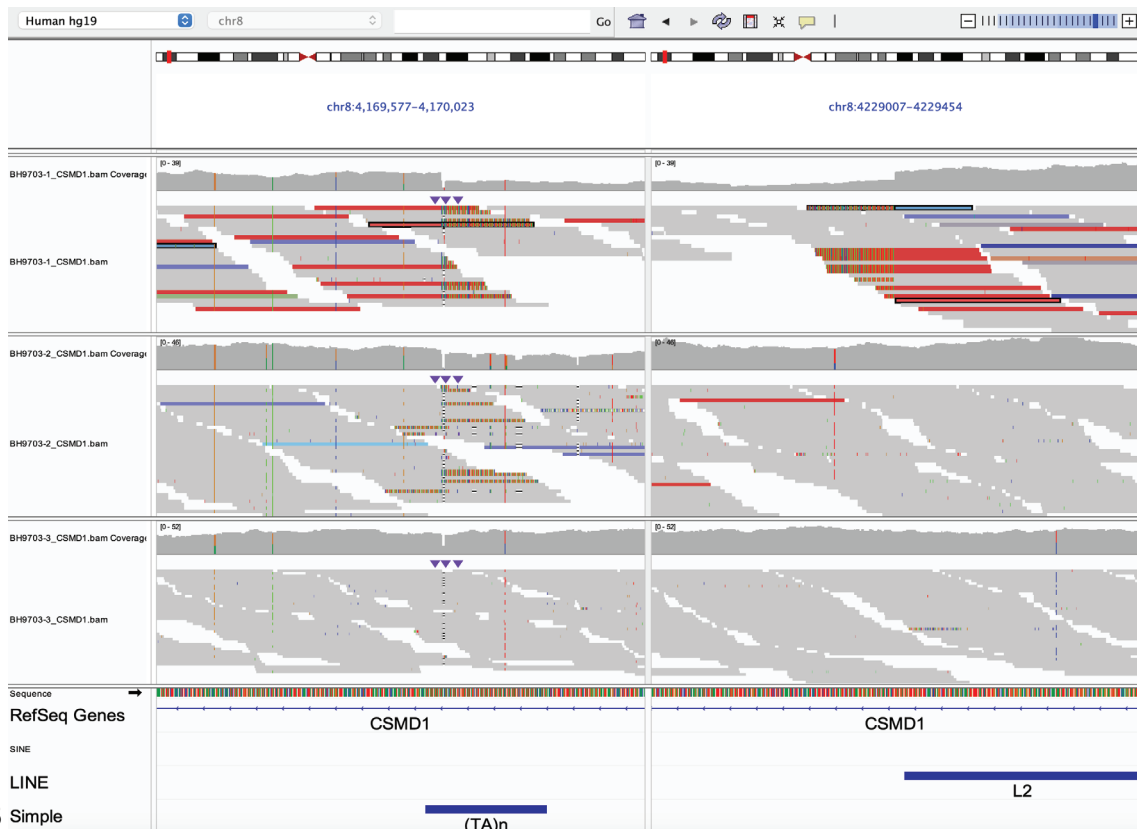

Figure S8 Simple



**Figure S8. *De Novo* Deletion of LncRNA in Proband BH9703-1.** **a)** The upper panel illustrates the ideogram of chromosome 8. The lower panel presents VizCNV output, displaying  $\log_2$  ratio and B-allele frequency plots that identify a *de novo* deletion impacting *CSMD1*. **b)** The upper panel displays the canonical *CSMD1* transcript along with a smaller noncoding gene (highlighted in green), which is antisense to *CSMD1*. The deletion, within intron 3 of *CSMD1*, does not disrupt any exons but completely remove the entire long non-coding RNA gene. The diagram also provides a detailed view of the deletion's genomic structure. Noting the simple repeat and LINE element near the breakpoint. **c)** IGV visualization of the deletion's breakpoint junction of SR-WGS.
